# Supplementary material
Source: PubMed Central journal article supplement (PMC3604187)
Supplement: NIHMS424654-supplement-Supp_FigureS1-S3.pdf [file NIHMS424654-supplement-Supp_FigureS1-S3.pdf]

## Supporting Information

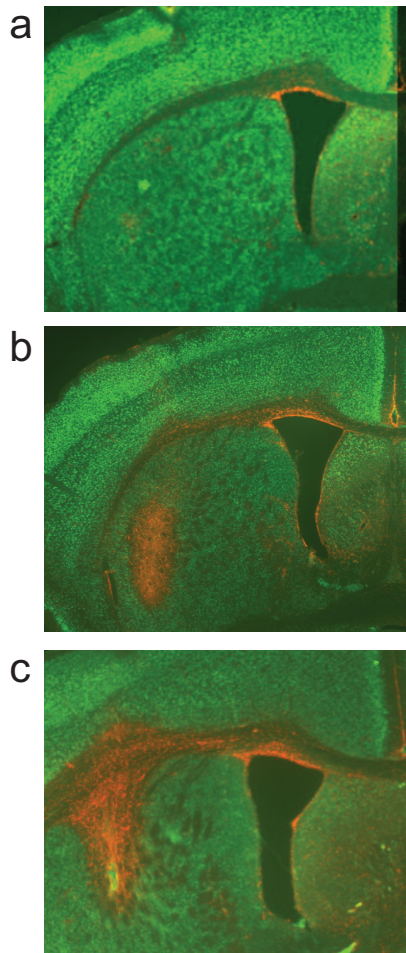

Supplementary Figure 1. Samples of immunostaining for NeuN (green) and GFAP (red) in saline control (a), lateral (b), and intermediate (c) dorsal striatum lesion conditions.

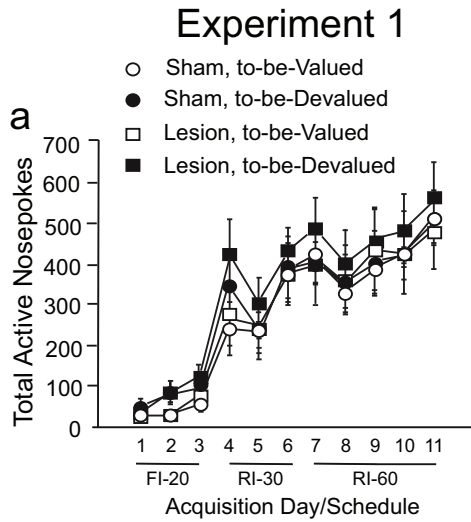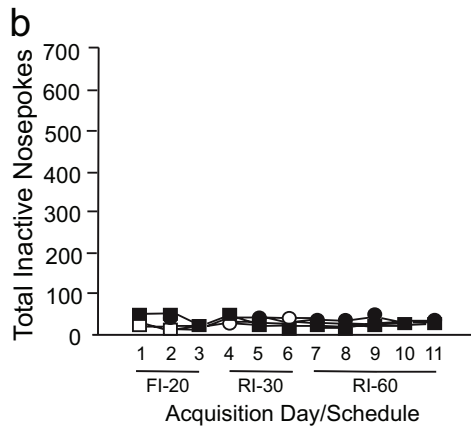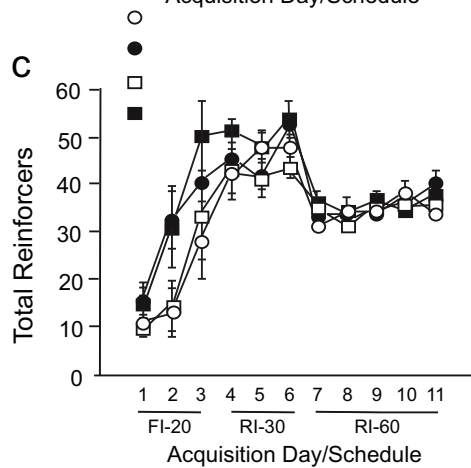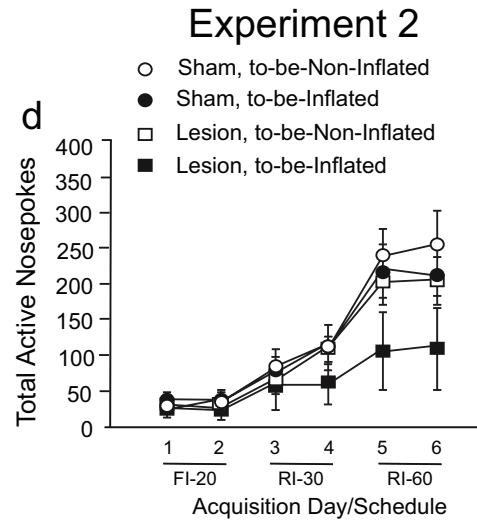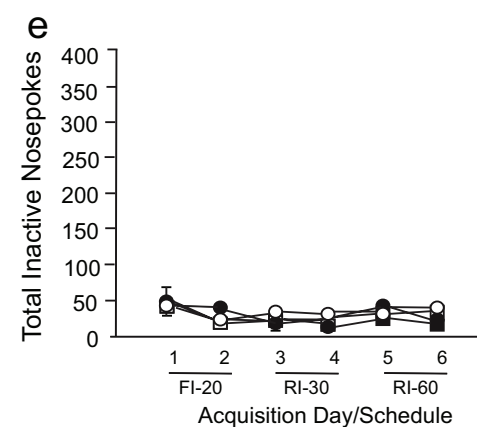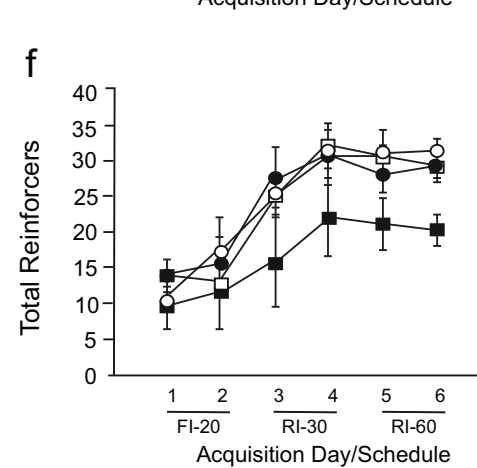

**Supplementary Figure 2.** Acquisition session data for Experiments 1 (devaluation) and 2 (inflation). Total number of active nosepokes (a,d), inactive nosepokes (b,e) and reinforcers (c,f) are shown for each acquisition session. X-axis indicates the schedule of reinforcement used during each acquisition session. No overall acquisition differences were observed in either experiment based upon lesion condition or reinforcer value condition.

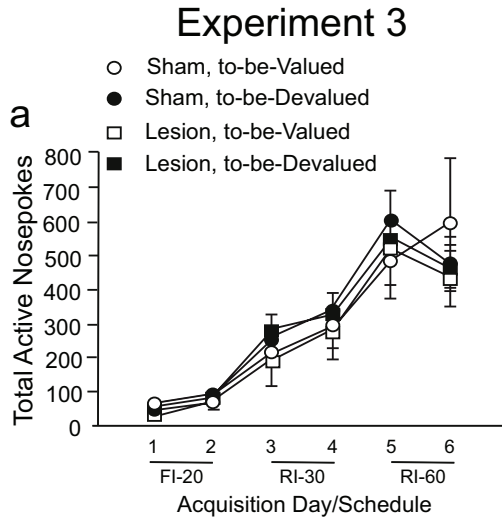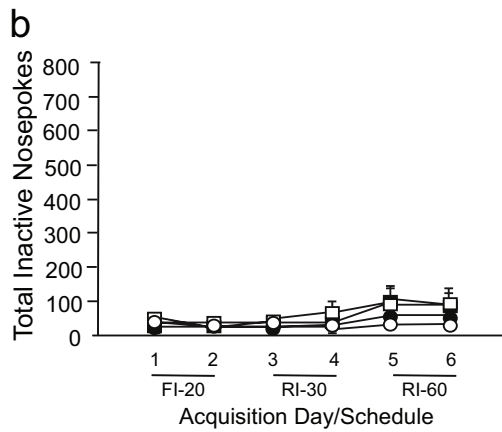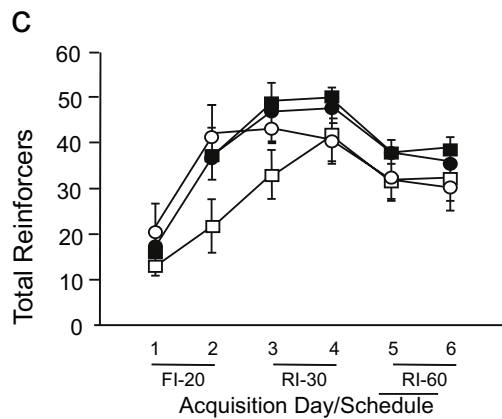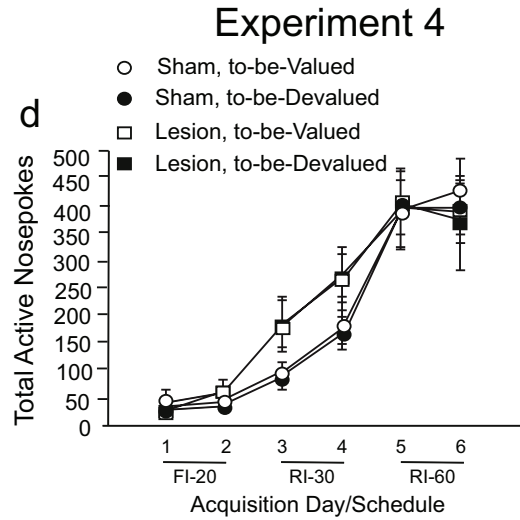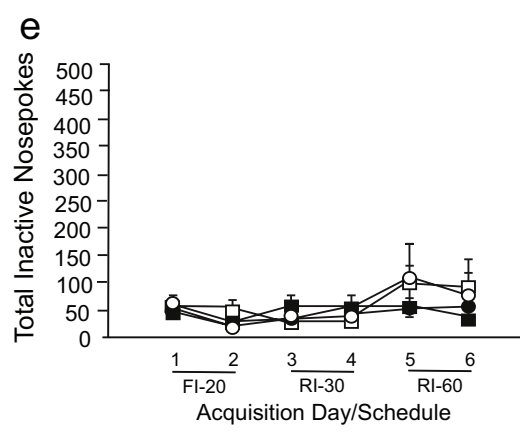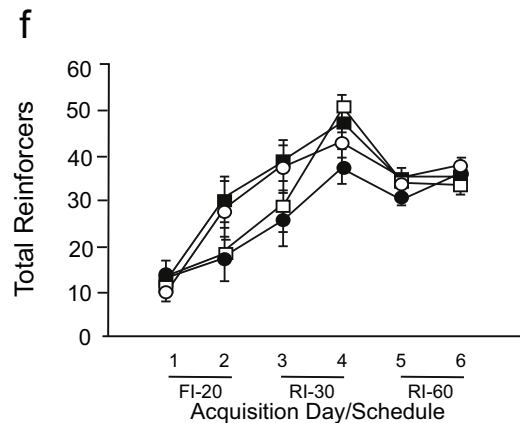

**Supplementary Figure 3.** Acquisition session data for Experiments 3 (dorsolateral lesions) and 4 (intermediate dorsal lesions). Total number of active nosepokes (a,d), inactive nosepokes (b,e) and reinforcers (c,f) are shown for each acquisition session. X-axis indicates the schedule of reinforcement used during each acquisition session. No overall acquisition differences were observed in either experiment based upon lesion condition or reinforcer value condition.
